# Supplementary material for: Cardioprotection and Suppression of Fibrosis by Diverse Cancer and Non-Cancer Cell Lines in a Murine Model of Duchenne Muscular Dystrophy
Source: MDPI journal article supplement (doi:10.3390/ijms25084273), 2024-04-12
Supplement: s1 [file s1]

## Supplementary figures

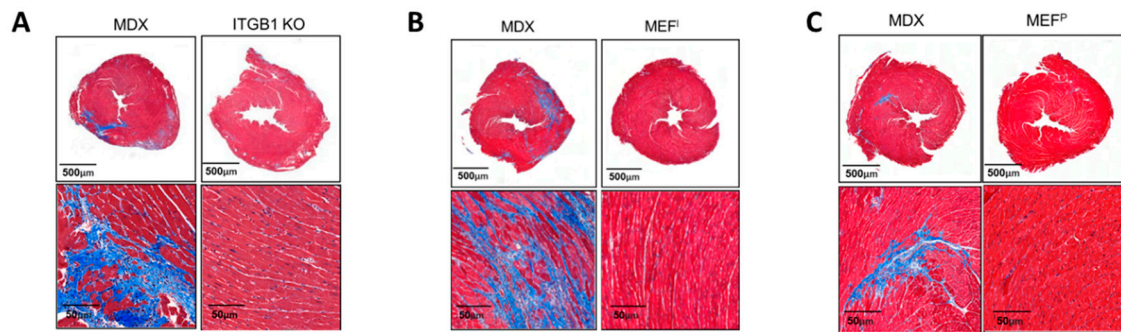

**Supplementary figure S1.** Injection of less aggressive PyMT ITGB1 KO cells and non-cancerous MEF<sup>I</sup> and MEF<sup>P</sup> cells led to a reduction in fibrosis in the hearts of MDX mice. Representative image of the heart of control MDX (left), MDX injected mice (right) with **(A)** PyMT ITGB1 KO, **(B)** MEF<sup>I</sup>, and **(C)** MEF<sup>P</sup> cells, stained for Masson's trichrome. Scale bar: 500  $\mu$ m (top) and 50  $\mu$ m (bottom).

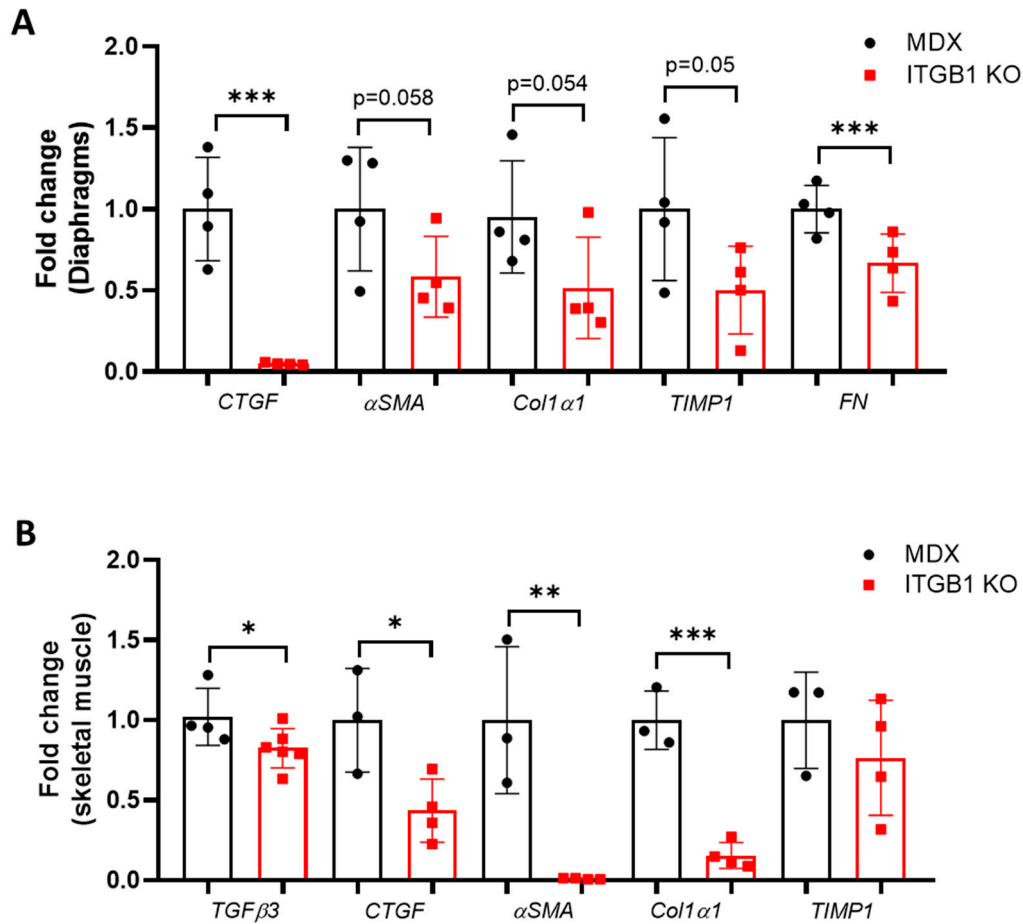

**Supplementary figure S2.** Injection of less aggressive PyMT ITGB1 KO cells resulted in a significant decrease in fibrotic hallmark genes of the diaphragm and skeletal muscles of MDX mice. (**A-B**) Transcription levels of fibrosis hallmark gene markers TGF $\beta$ 3, CTGF,  $\alpha$ SMA, Col1 $\alpha$ 1, and TIMP1 in of ITGB1 KO-bearing MDX mice compared to control MDX mice in the diaphragm muscles(**A**) and in the skeletal muscles (**B**), measured using qRT-PCR normalized to mB2M and  $\beta$ ACTIN gene, respectively. Data are presented as mean  $\pm$  SE. One-way ANOVA followed by Tukey post-test; (**A,B**). \* p < 0.05; \*\* p < 0.01; \*\*\* p < 0.001. Each dot represents one mouse.

**A**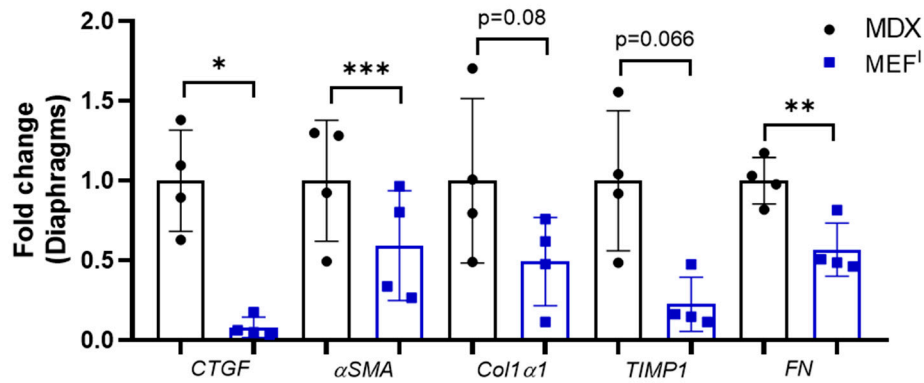**B**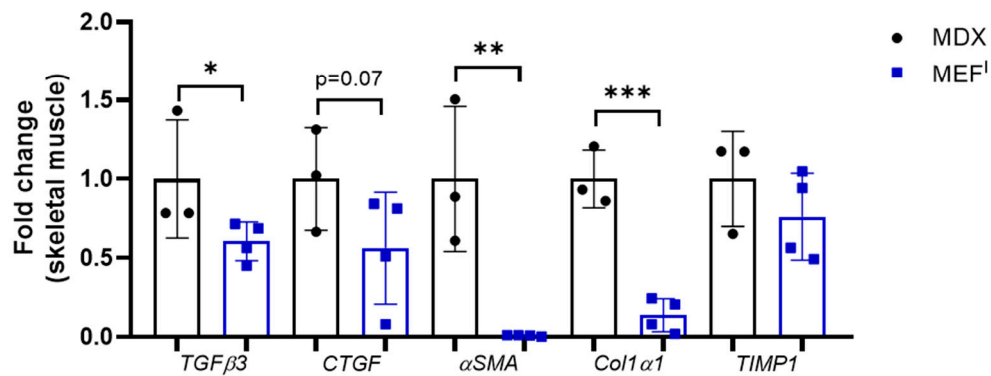

**Supplementary figure S3.** Injection of non-cancerous MEF<sup>l</sup> cells led to a significant decrease in fibrotic hallmark genes of the diaphragm and skeletal muscles of MDX mice. **(A-B)** Transcription levels of fibrosis hallmark gene markers TGF $\beta$ 3, CTGF,  $\alpha$ SMA, Col1 $\alpha$ 1 and TIMP1 in of MEF<sup>l</sup> injected MDX mice compared to control MDX mice in the diaphragm muscles(**A**) and in the skeletal muscles (**B**), measured using qRT-PCR normalized to mB2M and  $\beta$ ACTIN gene, respectively. Data are presented as mean  $\pm$  SE. One-way ANOVA followed by Tukey post-test; **(A,B)**. \*  $p < 0.05$ ; \*\*  $p < 0.01$ ; \*\*\*  $p < 0.001$ . Each dot represents one mouse.

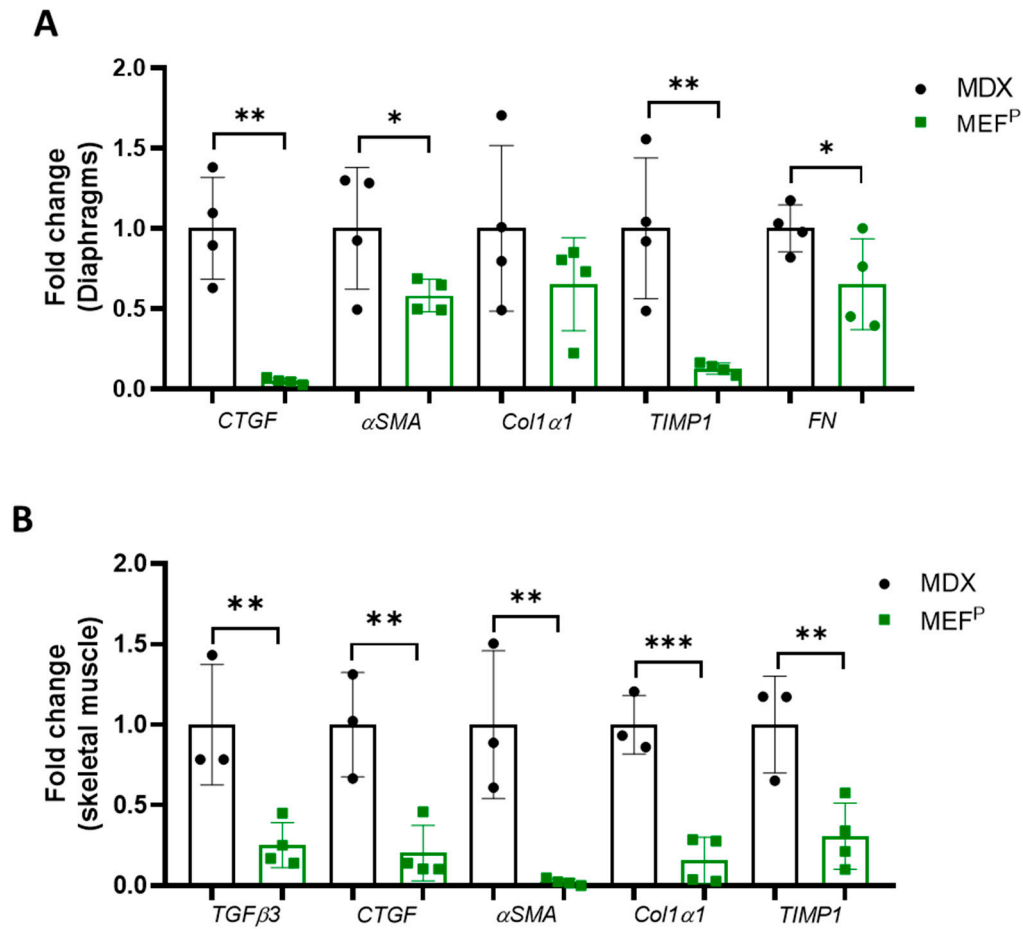

**Supplementary figure S4.** Injection of non-cancerous MEF<sup>P</sup> cells led to a significant decrease in fibrotic hallmark genes of the diaphragm and skeletal muscles of MDX mice. **(A-B)** Transcription levels of fibrosis hallmark gene markers TGFβ3, CTGF, αSMA, Col1α1 and TIMP1 in of MEF<sup>P</sup> injected MDX mice compared to control MDX mice in the diaphragm muscles **(A)** and in the skeletal muscles **(B)**, measured using qRT-PCR normalized to mB2M and βACTIN gene, respectively. Data are presented as mean ± SE. One-way ANOVA followed by Tukey post-test; **(A,B)**. \* p < 0.05; \*\* p < 0.01; \*\*\* p < 0.001. Each dot represents one mouse.

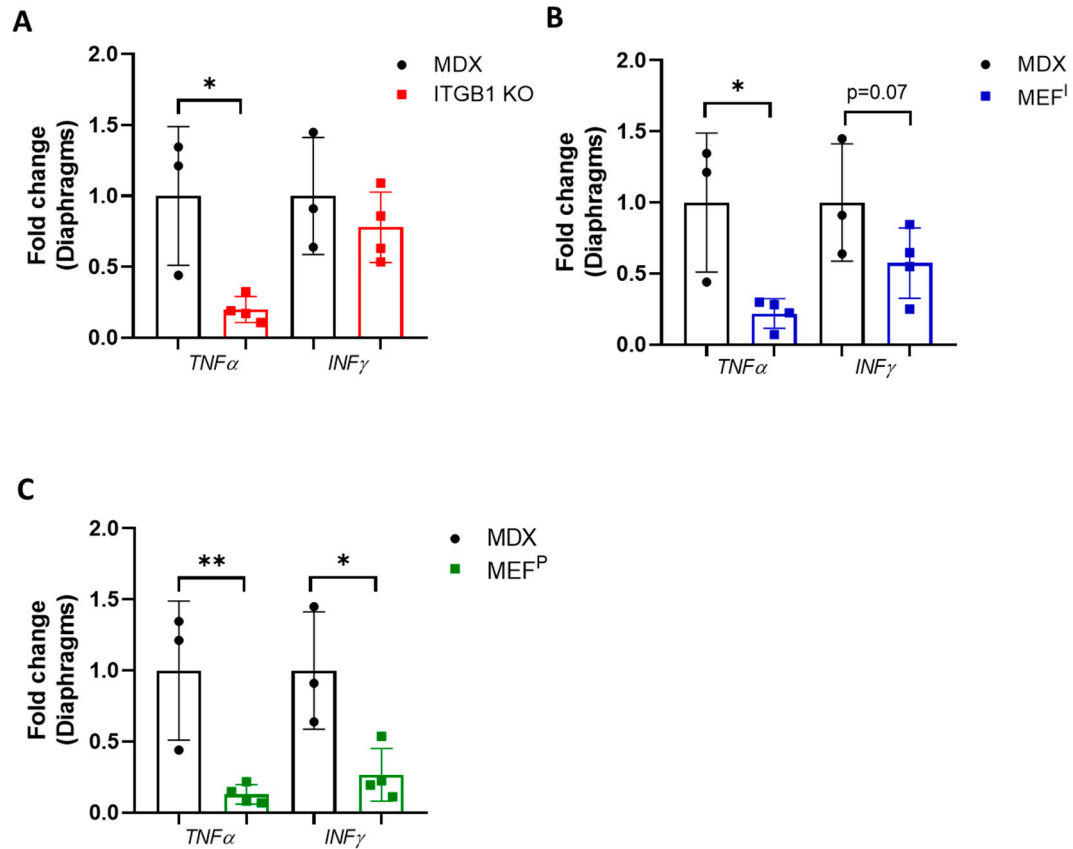

**Supplementary figure S5.** Injection of less aggressive PyMT ITGB1 KO cells and non-cancerous MEF<sup>l</sup> and MEF<sup>p</sup> cells resulted in the downregulation of the M1-polarizing hallmark gene in the diaphragm muscles of MDX mice. (**A-C**) qRT-PCR measuring transcription levels of M1-macrophage polarizing gene: *TNFα* and *INFγ*, in the diaphragm of MDX mice (**A**) injected with ITGB1 KO, (**B**) MEF<sup>l</sup> and, (**C**) MEF<sup>p</sup> cells, as compared to control MDX. Measurements were obtained using qRT-PCR, normalized to housekeeping gene *mB2M*. Data are presented as mean ± SE. One-way ANOVA followed by Tukey post-test (**A-C**). \*  $p < 0.05$ ; \*\*  $p < 0.01$ . Each dot represents one mouse.

| Gene   | Forward                  | Reversed                  |
|--------|--------------------------|---------------------------|
| Hsp90  | TCGTCAGAGCTGATGATGAAGT   | GCGTTTAACCCATCCAACCTGAAT  |
| mb2M   | TTCTGGTGCTTGTCTCACTGA    | CAGTATGTTCTGGCTTCCCATTCT  |
| ACTA2  | GTCCCAGACATCAGGGAGTAA    | TCGGATACTTCAGCGTCAGGA     |
| Col1α1 | CTGGCGGTTTCAGGTCCAAT     | TTCCAGGCAATCCACGAGC       |
| TGFβ3  | CCTGGCCCTGCTGAACTTG      | GACGTGGGTCATCACCGAT       |
| CTgF   | AGACCTGTGGGATGGGCAT      | GCTTGGCGATTTTAGGTGTCC     |
| TIMP   | GCAACTCGGACCTGGTCATAA    | CGGCCCCGTGATGAGAACT       |
| α-SMA  | GTCCCAGACATCAGGGAGTAA    | TCGGATACTTCAGCGTCAGGA     |
| FN     | TGGTGGCCACTAAATACGAA     | GGAGGGCTAACATTCTCCAG      |
| POSTN  | CCTGCCCTTATATGCTCTGCT    | AAACATGGTCAATAGGCATCACT   |
| G-CSF  | CGTTCCCCTGGTCAGTGTC      | CCGCTGGCCTGGATCTTC        |
| GRP18  | TGAAGCCCAAGGTCAAGGAGAAG  | TTCATGAGGAAGGTGGTGAAGGC   |
| Arg1   | AATGAAGAGCTGGCTGGTGT     | CTGGTTGTCAGGGGAGTGTT      |
| CD163  | CCTCCTCATTGTCTTCCTCCTGTG | CATCCGCCTTTGAATCCATCTCTTG |
| INFγ   | ACAGCAAGGCGAAAAAGGATG    | TGGTGGACCACTCGGATGA       |
| TNF-α  | CCCTCACACTCAGATCATCTTCT  | GCTACGACGTGGGCTACAG       |
| CCL2   | GTGATGGAGGGGGTCAGGA      | GGGATGGGACAGCCTAACT       |
| IL-1   | GCAACTGTTCTGAACTCAACT    | ATCTTTTGGGGTCCGTCAACT     |
| IL-13  | AACGGCAGCATGGTATGGAGTG   | TGGGTCCTGTAGATGGCATTGC    |

**Supplemental Table S1:** The sequences of the oligonucleotides used for qRT-PCR of the indicated genes.
